# Supplementary material for: The Relationship Between Physicochemical Parameters and Macroinvertebrate Metrics for Ecological Biomonitoring in The Little Akaki River, Addis Ababa, Ethiopia
Source: Research Square preprint supplement (doi:10.21203/rs.3.rs-8475505/v1), 2026-01-07
Supplement: Supplementary file 1 [file 08b3b9aa96b9cc9cf4d4ae13.xlsx]

## Sheet: Physico-chemical 
						Little Akaki River
Sites	Date	Time	Northing	Easting	Elevation (m)	DO	%sat	Temp	Cond(µs/cm)	pH	Ph	Tur (NTU)	TDS(ppm)	TSS (mg/l)	SRP (mg/l)	NO3 mg/l	NH3 mg/l	TP mg/l
Upstream Gefersa	17/5/2024	3.31am	9.09074	38.6315	2619	7.25	99.6	18.1	172.2	7.82	6.54	16.5	111	16	0.0001	0.000156238	0.023	0.0048
						7.6	99.6	18.2	168.8	7.88	6.6	16.5	106	16	0.0001	0.000158842	0.0244286	0.0028
						7.6	99.3	18.2	168.8	7.9	6.62	15.6	108	16	0.0001	0.00016405	0.0215714	0.0028
Down Gefersa	17/5/2024	0.260417	9.06177	38.6436	2555	6.35	96.3	20.8	186.5	4.49	4.49	250	140	84	0.1048	0.000205714	0.320143	0.3588
						6.41	96.3	20.6	189.6	5.01	5.01	228	138	84	0.1088	0.000207016	0.320143	0.3588
						6.42	96.4	20.6	190.2	4.84	4.84	256	137	84	0.1008	0.000217432	0.321571	0.3688
Kolfa Bridge	17/5/2024	7.45	9.01993	38.7089	2349	3.15	48	22.5	715	8.33	7.05	32.2	496	30	0.8228	0.000179674	0.350143	1.0048
						3.1	47	22.4	717	8	6.72	30.2	494	30	0.8228	0.00017707	0.351571	1.0028
						2.81	42.9	22.6	720	8.29	7.01	29	499	30	0.8208	0.000179674	0.358714	1.0148
Alert Hospital	17/5/2024	0.388889	8.98828	38.7069	2266	3.95	61.9	24.5	792	8.93	7.65	21.2	550	26	0.6288	0.000182278	0.033	0.7488
						3.96	61.6	24	792	8.93	7.65	24.9	558	26	0.6268	0.000179674	0.033	0.7488
						3.91	60.7	24	792	8.93	7.65	31	562	26	0.6268	0.00018358	0.033	0.7548
Kadisko	18/5/24	0.294444	8.93027	38.7567	2161	0.63	9.7	24.2	1259	7.72	6.44	162	745	140	1.3708	0.000186184	0.345857	1.4808
						0.54	8.3	24	1260	7.84	6.56	171	763	140	1.3708	0.000188788	0.347286	1.4908
						0.54	8.3	24	1260	7.84	6.56	175	777	140	1.3768	0.000184882	0.343	1.4948
Gelan/LAR downstream	25/09/24	0.21875	8.90385	38.7455	2085	5.91	86.1	21.8	1057	10.36	9.08	100	625	63	0.9988	0.000260398	0.0815714	1.2108
below haile garment						5.94	86.2	21.6	1036	9.94	8.66	100	635	63	0.9988	0.000263002	0.0815714	1.2128
						5.91	85.8	21.6	1036	10.09	8.81	102	658	63	1.0108	0.000252586	0.0872857	1.2288
Aba Samuel	19/5/24	0.435417	8.78879	38.7043	2050	2.9	41.7	21.3	1054	7.75	6.47	745	697	98	0.7788	0.000263002	0.108714	0.9048
	19/5/25					2.83	40.8	21.2	1054	7.8	6.52	760	704	98	0.7768	0.000265606	0.113	0.9028
	19/5/26					2.83	40.8	21.3	1056	7.82	6.54	747	641	98	0.7728	0.000264304	0.107286	0.9028

## Sheet: M_GSM
	Order	Feeding group	Family/taxa	Upstream Gefersa	Down Gefersa	Kolfa Bridge	Zeneb work	Kadisko	Gelan	Aba samuel
	Ephemeroptera (Mayflies)	Scraper	Baetidae	310	21	16	10	0	4	0
		Scraper	Caenidae	120	15	13	12	0	2	0
		Scraper	Heptageniidae	62	3	0	0	0	0	0
	Hemiptera (True bugs)	Predator	Corixidae	20	26	8	0	0	0	0
		Predator	Gerridae	33	8	4	0	0	0	0
		Predator	Notonectidae	167	12	7	6	0	6	0
		Predator	Belostomatidae	22	0	0	0	0	0	0
		Predator	Nepidae	14	0	0	0	0	0	0
		Predator	Naucoridae	22	0	0	0	0	0	0
		Predator	Velidae	22	0	0	0	0	0	0
	Coleoptera (Beetles)	Predator	Dytiscidae	35	16	13	8	2	2	0
	Odonata (Damselflies)	Predator	Coenagrionidae	76	22	14	0	0	0	0				GSM		3252
	Odonata (Dragon fly)	Predator	Aeshnidae	54	0	0	0	0	0	0				FS		2474
		Predator	Gomphidae	22	0	0	0	0	0	0				total		5726
	Diptera (True flies)	Collector	Chironomidae	29	383	173	185	193	120	46
			Dixidae	0	0	26	50	12	17	0
		Collector	Psychodidae	28	0	0	58	95	51	0
		Collector	Culicidae	0	92	114	38	52	128	2
		filterer/collector	Simulidae	0	0	0	24	0	0	0
		Collector	Trichoceridae	0	0	4	47	0	4	0
		Collector	syrphidae	0	0	0	0	23	0	0
		Predator	Muscidae	0	0	0	0	80	0	0
		Collector	Ephydridae	0	0	3	8	32	0	5
		Shredder	Tipulidae	0	33	18	77	11	32	0
	Basommatophora	SCRAPER	Planorbidae	35	0	0	0	0	0	0
			Thiaridae	0	10	0	5	3	3
		SCRAPER	Physidae	0	0	0	13	22	0	0
		Filterer/Collector	Sphaeriodae	18	0	0	0	0	0	0
	Annelida/Phylum	Collector	Oligochaeta	36	68	340	442	360	580	73
	Lepidoptera	Shredder	Pyralidae	0	13	0	0	0	0	0
	Hydracarina	Predator	Hydrachnellae	0	14	0	0	0	0	0
	Trichoptera (Caddis fly)	shredders	Ecnomidae	0	14	0	0	0	0	0
			Sum	1125	750	753	983	885	949	126	5571
		metrics

## Sheet:  richness and Composition 
ORDER	Family/taxa	Upstream Gefersa	Down Gefersa	Kolfa Bridge	Zeneb work	Kadisko	Gelan	Aba samuel
Ephemeroptera (Mayflies)	Baetidae	296	14	12	7	6	2	0
	Caenidae	104	5	6	9	0	2	0
	Heptageniidae	39	3	0	0	0	0	0
Hemiptera (True bugs)	Corixidae	20	11	8	0	0	0	0
	Gerridae	33	8	4	0	0	0	0
	Notonectidae	142	12	7	6	0	6	0		total taxa=30
	Belostomatidae	22	0	0	0	0	0	0
	Nepidae	14	0	0	0	0	0	0
	Naucoridae	22	0	0	0	0	0	0
	Velidae	22	0	0	0	0	0	0
Coleoptera (Beetles)	Dytiscidae	45	26	13	8	2	2	0
Odonata (Damselflies)	Coenagrionidae	52	22	14	0	0	0	0
Odonata (Dragon fly)	Aeshnidae	32	0	0	0	0	0	0
	Gomphidae	22	0	0	0	0	0	0
Diptera (True flies)	Chironomidae	29	46	186	138	118	35	46
	Psychodidae	28	0	0	19	95	29	0
	Culicidae	0	40	62	35	30	0	2
	Simulidae	0	0	0	24	0	0	0
	Trichoceridae	0	0	0	14	0	0	0
	syrphidae	0	0	0	0	23	0	0
	Muscidae	0	0	0	0	80	0	0
	Ephydridae	0	0	3	0	32	0	0
	Tipulidae	0	33	0	4	0	22	0
Basommatophora	Planorbidae	35	0	0	0	10	0	0
	Physidae	0	0	0	13	22	0	0
	Sphaeriodae	18	0	0	0	0	0	0
Annelida/Phylum	Oligochaeta	23	35	120	374	145	234	27
Lepidoptera	Pyralidae	20	13	0	0	7	0	0
Hydracarina	Hydrachnellae	0	14	0	0	0	0	0
Trichoptera (Caddis fly)	Ecnomidae	4	2	0	0	0	0	0
	Sum	1022	284	435	651	570	332	75
Richness	Total abundance	1022	284	435	651	570	332	75
	No E	439	22	18	16	6	4	0
	No ET	443	24	18	16	6	4	0
	No Coleoptera	45	26	13	8	2	2	0
	No Diptera	57	119	251	234	378	86	48
	No chironomidae	29	46	186	138	118	35	46
	No Oligochaeta	23	35	120	374	145	234	27
Composition	% E	42.955	7.74648	4.13793	2.45776	1.05263	1.20482	0
	% ET	43.3464	8.4507	4.13793	2.45776	1.05263	1.20482	0
	% Col	4.40313	9.15493	2.98851	1.22888	0.350877	0.60241	0
	% Diptera	5.5773	41.9014	57.7011	35.9447	66.3158	25.9036	64
	% Chirono	2.83757	16.1972	42.7586	21.1982	20.7018	10.5422	61.3333
	% Oligo	2.25049	12.3239	27.5862	57.4501	25.4386	70.4819	36

## Sheet: Diversity
	Upstream Gefersa	Down Gefersa	Kolfa Bridge	Zeneb work	Kadisko	Gelan	Aba samuel
Taxa_S	21	15	11	12	12	8	3
Individuals	1022	284	435	651	570	332	75
Dominance_D	0.1271	0.09747	0.2812	0.3806	0.1632	0.5189	0.4998
Simpson_1-D	0.8729	0.9025	0.7188	0.6194	0.8368	0.4811	0.5002
Shannon_H	2.545	2.473	1.599	1.435	2.023	1.052	0.7776
Evenness_e^H/S	0.6069	0.7904	0.4497	0.3499	0.6299	0.3579	0.7254

## Sheet: FFG
Feeding group	Upstream Gefersa	Down Gefersa	Kolfa Bridge	Zeneb work	Kadisko	Gelan	Aba samuel
Scraper	296	14	12	8	6	3	0
Scraper	104	5	6	9	0	2	0
Scraper	39	3	0	0	0	0	0
Predator	20	11	8	0	0	0	0
Predator	33	8	4	0	0	0	0
Predator	142	12	7	6	0	6	0
Predator	22	0	0	0	0	0	0
Predator	14	0	0	0	0	0	0
Predator	22	0	0	0	0	0	0
Predator	22	0	0	0	0	0	0
Predator	35	16	13	8	2	2	0
Predator	0	17	2	3	0	3	0
Predator	0	8	4	0	0	0	0
Predator	0	0	9	0	0	0	0
Predator	52	22	14	0	0	0	0
Predator	32	0	0	0	0	0	0
Predator	22	0	0	0	0	0	0
Collector	29	46	186	138	118	35	46
Collector	28	0	0	19	95	29	0
Collector	0	40	62	35	30	0	2
filterer/collector	0	0	0	24	0	0	0
Collector	0	0	0	14	0	0	0
Collector	0	0	0	0	23	0	0
Predator	0	0	0	0	80	0	0
Collector	0	0	3	0	32	0	0
Shredder	0	33	0	4	0	22	0
SCRAPER	35	0	0	0	10	0	0
SCRAPER	0	0	0	13	22	0	0
Filterer/Collector	18	0	0	0	0	0	0
Collector	23	35	120	374	145	234	27
Shredder	0	13	0	0	7	0	0
Predator	0	14	0	0	0	0	0
shredders	0	2	0	0	0	0	0
sum	988	299	450	655	570	336	75	3373
Shredders	0	48	0	4	7	22	0	3395
%shredders	0	0.160535	0	0.00610687	0.0122807	0.0654762	0
collectors	80	121	371	580	443	298	75
%collectors	8.09717	40.4682	82.4444	88.5496	77.7193	88.6905	100
scrapers	474	22	18	30	38	5	0
%scrapers	47.9757	7.35786	4	4.58015	6.66667	1.4881	0
filterers	18	0	0	24	0	0	0
%filterers	1.82186	0	0	3.66412	0	0	0
predator	438	108	61	17	82	11	0
%predator	44.332	36.1204	13.5556	2.59542	14.386	3.27381	0
scrapers:filterers	26.3333	1.22222	1	1.66667	2.11111	0.277778	0

## Sheet: ETbios
	Family/taxa	Upstream Gefersa	Down Gefersa	Kolfa Bridge	Zeneb work	Kadisko	Gelan	Aba samuel
	Baetidae	4	4	4	4	4	4	0
	Caenidae	6	6	6	6	0	6	0
	Heptageniidae	9	9	0	0	0	0	0
	Corixidae	4	4	4	0	0	0	0
	Gerridae	5	5	5	0	0	0	0
	Notonectidae	3	3	3	3	0	6	0
	Belostomatidae	3	0	0	0	0	0	0
	Nepidae	3	0	0	0	0	0	0
	Naucoridae	6	0	0	0	0	0	0
	Velidae	5	0	0	0	0	0	0
	Dytiscidae	5	5	5	5	5	5	0
	Coenagrionidae	4	4	4	0	0	0	0
	Aeshnidae	7	0	0	0	0	0	0
	Gomphidae	6	0	0	0	0	0	0
	Chironomidae	1	1	1	1	1	1	1
	Psychodidae	1	0	0	1	1	1	0
	Culicidae	0	1	1	1	1	0	1
	Simulidae	0	0	0	5	0	0	0
	Trichoceridae	0	0	0	1	0	0	0
	syrphidae	0	0	0	0	1	0	0
	Muscidae	0	0	0	0	2	0	0
	Ephydridae	0	0	3	0	3	0	0
	Tipulidae	0	7	0	7	0	7	0
	Planorbidae	3	0	0	0	0	0	0
	Physidae	0	0	0	3	3	0	0
	Sphaeriodae	3	0	0	0	0	0	0
	Oligochaeta	1	1	1	1	1	1	1
	Pyralidae	9	9	0	0	0	0	0
	Hydrachnellae	0	8	0	0	0	0	0
	Ecnomidae	8	8	0	0	0	0	0
metrics	ETBios score	96	75	37	38	22	31	3
	No taxa	21	15	11	12	12	8	3
	ASPT	4.57143	5	3.36364	3.16667	1.83333	3.875	1

## Sheet: SASS
ORDER	Family/taxa	Upstream Gefersa	Down Gefersa	Kolfa Bridge	Zeneb work	Kadisko	Gelan	Aba samuel
Ephemeroptera (Mayflies)	Baetidae	4	4	4	4	4	4	0
	Caenidae	6	6	6	6	6	6	0
	Heptageniidae	13	13	0	0	0	0	0
Hemiptera (True bugs)	Corixidae	3	3	3	0	0	0	0
	Gerridae	5	5	5	0	0	0	0
	Notonectidae	3	3	3	3	0	3	0
	Belostomatidae	3	0	0	0	0	0	0
	Nepidae	3	0	0	0	0	0	0
	Naucoridae	7	0	0	0	0	0	0
	Velidae	5	0	0	0	0	0	0
Coleoptera (Beetles)	Dytiscidae	5	5	5	5	5	5	0
	Chrysomelidae	0	0	0	0	0	0	0
	Carticarinae/hydraenidae	0	0	0	0	0	0	0
	Staphylinidae/ rove beetles	0	0	0	0	0	0	0
Odonata (Damselflies)	Coenagrionidae	4	4	4	0	0	0	0
Odonata (Dragon fly)	Aeshnidae	8	0	0	0	0	0	0
	Gomphidae	6	0	0	0	0	0	0
Diptera (True flies)	Chironomidae	2	2	2	2	2	2	2
	Psychodidae	1	0	0	1	1	1	0
	Culicidae	1	1	1	1	1	0	1
	Simulidae	5	0	0	5	0	0	0
	Trichoceridae	0	0	0	1	0	0	0
	syrphidae	0	0	0	0	1	0	0
	Muscidae	0	0	0	0	1	0	0
	Ephydridae	0	0	3	0	3	0	0
	Tipulidae	0	5	0	5	0	5	0
Basommatophora	Planorbidae	3	0	0	0	3	0	0
	Physidae	0	0	0	3	3	0	0
	Sphaeriodae	3	0	0	0	0	0	0
Annelida/Phylum	Oligochaeta	1	1	1	1	1	1	1
Lepidoptera	Pyralidae	12	12	0	0	0	0	0
Hydracarina	Hydrachnellae	0	8	0	0	0	0	0
Trichoptera (Caddis fly)	Ecnomidae	8	8	0	0	0	0	0
	SASS score	111	80	37	37	31	27	4
	No of taxa	21	15	11	12	12	8	3
	ASPT	5.28571	5.33333	3.36364	3.08333	2.58333	3.375	1.33333

## Sheet: Trait movt
ORDER	Family/taxa	movement	Upstream Gefersa	Down Gefersa	Kolfa Bridge	Zeneb work	Kadisko	Gelan	Aba samuel
Ephemeroptera (Mayflies)	Baetidae	swim	4	4	4	4	4	4	0
	Caenidae	sprawl	6	6	6	6	6	6	0
	Heptageniidae	burrow	13	13	0	0	0	0	0
Hemiptera (True bugs)	Corixidae	swim	3	3	3	0	0	0	0
	Gerridae	skate	5	5	5	0	0	0	0
	Notonectidae	swim	3	3	3	3	0	3	0
swim	Belostomatidae	climb	3	0	0	0	0	0	0
sprawl	Nepidae	climb	3	0	0	0	0	0	0
burrow	Naucoridae		7	0	0	0	0	0	0
swim	Velidae	skate	5	0	0	0	0	0	0
skate	Dytiscidae	swim	5	5	5	5	5	5	0
swim	Chrysomelidae		0	0	0	0	0	0	0
climb	Carticarinae/hydraenidae		0	0	0	0	0	0	0
climb	Staphylinidae/ rove beetles		0	0	0	0	0	0	0
	Coenagrionidae	climb/cling	4	4	4	0	0	0	0
skate	Aeshnidae	climb	8	0	0	0	0	0	0
swim	Gomphidae	burrow	6	0	0	0	0	0	0
Diptera (True flies)	Chironomidae	burrow	2	2	2	2	2	2	2
	Psychodidae	burrow and cling	1	0	0	1	1	1	0
	Culicidae		1	1	1	1	1	0	1
	Simulidae	cling	5	0	0	5	0	0	0
	Trichoceridae		0	0	0	1	0	0	0
	syrphidae		0	0	0	0	1	0	0
	Muscidae		0	0	0	0	1	0	0
	Ephydridae	sprawl	0	0	3	0	3	0	0
	Tipulidae	sprawl	0	5	0	5	0	5	0
Basommatophora	Planorbidae		3	0	0	0	3	0	0
	Physidae		0	0	0	3	3	0	0
	Sphaeriodae		3	0	0	0	0	0	0
Annelida/Phylum	Oligochaeta	burrow	1	1	1	1	1	1	1
Lepidoptera	Pyralidae	cling	12	12	0	0	0	0	0
Hydracarina	Hydrachnellae		0	8	0	0	0	0	0
Trichoptera (Caddis fly)	Ecnomidae		8	8	0	0	0	0	0

## Sheet: final FFG
ORDER	Family/taxa	Feeding Habit	tolerance value	Upstream Gefersa	Down Gefersa	Kolfa Bridge	Zeneb work	Kadisko	Gelan	Aba samuel
Ephemeroptera (Mayflies)	Baetidae	Collector/Gatherr and scraper	4 (Moderate)	4	4	4	4	4	4	0
	Caenidae	Collector/Gatherr and scraper	7(high)	6	6	6	6	6	6	0
	Heptageniidae	scraper	4(moderate)	13	13	0	0	0	0	0
Hemiptera (True bugs)	Corixidae	collector/gatherer	9(high)	3	3	3	0	0	0	0
	Gerridae	predator	undtermined	5	5	5	0	0	0	0
	Notonectidae	predator	undtermined	3	3	3	3	0	3	0
	Belostomatidae	predator	10(high)	3	0	0	0	0	0	0
	Nepidae	predator	8(high)	3	0	0	0	0	0	0
	Naucoridae	predator	5(moderate)	7	0	0	0	0	0	0
	Velidae	predator	6(moderate)	5	0	0	0	0	0	0
Coleoptera (Beetles)	Dytiscidae	predator	5(moderate)	5	5	5	5	5	5	0
Odonata (Damselflies)	Coenagrionidae	predator	9(high)	4	4	4	0	0	0	0
Odonata (Dragon fly)	Aeshnidae	predator	3(low)	8	0	0	0	0	0	0
	Gomphidae	predator	1(low)	6	0	0	0	0	0	0
Diptera (True flies)	Chironomidae	collector/gatherer(collector filtreer)	6(moderate)	2	2	2	2	2	2	2
	Psychodidae	collector/gatherer	10(high)	1	0	0	1	1	1	0
	Culicidae	collector/filterer and collector gatherer	8(high)	1	1	1	1	1	0	1
	Simulidae	collector/filterer	6(moderate)	5	0	0	5	0	0	0
	Trichoceridae	collector/filterer		0	0	0	1	0	0	0
	syrphidae	collector/gatherer	10(high)	0	0	0	0	1	0	0
	Muscidae	predator	6(modeate)	0	0	0	0	1	0	0
	Ephydridae	collector/gatherer	6(moderate)	0	0	3	0	3	0	0
	Tipulidae	shredder(predator, collector/grather	3(low)	0	5	0	5	0	5	0
Basommatophora	Planorbidae	scraper		3	0	0	0	3	0	0
	Physidae	scraper	7(high)	0	0	0	3	3	0	0
	Sphaeriodae	scraper		3	0	0	0	0	0	0
Annelida/Phylum	Oligochaeta	collector/gatherer	8(high)	1	1	1	1	1	1	1
Lepidoptera	Pyralidae	shredder	5(moderate)	12	12	0	0	0	0	0
Hydracarina	Hydrachnellae			0	8	0	0	0	0	0
Trichoptera (Caddis fly)	Ecnomidae			8	8	0	0	0	0	0
				2.48491
